# Supplementary material for: Biodiversity conservation in an anthropized landscape: Trees, not patch size drive, bird community composition in a low-input agro-ecosystem
Source: PLOS journal article supplement (doi:10.1371/journal.pone.0179438), 2017-07-07
Supplement: S2 (10.1371/journal.pone.0179438.s002) [file journal.pone.0179438.s002]

S2 Table. Effect of the presence or not of trees and the size of the patch in which the orchard was on explicative variables of birds in the Llanos de Ojuelos, Jalisco and Zacatecas, México. 2013-2014. Mean and standard deviation are presented.

|             | Trees      |            | Size       |            |
|-------------|------------|------------|------------|------------|
|             | Yes        | No         | Large      | Small      |
| FHD-along   | 1.08±0.44  | 0.67±0.37  | 0.74±0.54  | 1.01±0.3   |
| FHD-across  | 1.77±0.23  | 1.54±1.89  | 1.65±0.23  | 1.66±0.25  |
| Tree cover  | 1.21±2.06  | 0          | 0.43±1.01  | 0.78±1.98  |
| Shrub cover | 4.22±4.87  | 1.45±3.36  | 3.17±5.14  | 2.5±3.51   |
| Herb cover  | 27.68±19.9 | 33.93±27   | 24.22±20   | 37.4±25.5  |
| Nopal cover | 11.51±3.11 | 9.47±4.29  | 11.58±3.65 | 9.4±3.8    |
| Bare ground | 25.65±12.3 | 22.65±24.7 | 34.88±21.6 | 13.42±8.06 |
| Litter      | 29.43±19.1 | 29.92±23.8 | 25.23±17.4 | 34.12±24.3 |
| Seeds       | 7.7±9.57   | 7±12       | 6.03±9.57  | 8.67±11.8  |
| Arthropods  | 10.47±12.9 | 15.2±13.1  | 14.73±12.9 | 10.93±9.54 |
